# Supplementary material for: Proteome profiling of cadmium-induced apoptosis by antibody array analyses in human bronchial epithelial cells
Source: PubMed Central journal article supplement (PMC4868746; doi:10.18632/oncotarget.6738), 2015-12-23
Supplement: oncotarget-07-6146-s001.pdf [file oncotarget-07-6146-s001.pdf]

## Proteome profiling of cadmium-induced apoptosis by antibody array analyses in human bronchial epithelial cells

### Supplementary Materials

**Supplementary Table S1: Human phospho-MAPK array coordinates**

| Coordinate | Target/Control       | Alternate Nomenclature       | Phosphorylation Site Detected |
|------------|----------------------|------------------------------|-------------------------------|
| A1, A2     | Reference Spots      | –                            | –                             |
| A21, A22   | Reference Spots      | –                            | –                             |
| B3, B4     | Akt1                 | PKB $\alpha$ , RAC $\alpha$  | S473                          |
| B5, B6     | Akt2                 | PKB $\beta$ , RAC $\beta$    | S474                          |
| B7, B8     | Akt3                 | PKB $\gamma$ , RAC $\gamma$  | S472                          |
| B9, B10    | Akt pan              | –                            | S473, S474, S472              |
| B11, B12   | CREB                 | –                            | S133                          |
| B13, B14   | ERK1                 | MAPK3, p44 MAPK              | T202/Y204                     |
| B15, B16   | ERK2                 | MAPK1, p42 MAPK              | T185/Y187                     |
| B17, B18   | GSK-3 $\alpha/\beta$ | GSK3A/GSK3B                  | S21/S9                        |
| B19, B20   | GSK-3 $\beta$        | GSK3B                        | S9                            |
| C3, C4     | HSP27                | HSPB1, SRP27                 | S78/S82                       |
| C5, C6     | JNK1                 | MAPK8, SAPK1 $\gamma$        | T183/Y185                     |
| C7, C8     | JNK2                 | MAPK9, SAPK1 $\alpha$        | T183/Y185                     |
| C9, C10    | JNK3                 | MAPK10, SAPK1 $\beta$        | T221/Y223                     |
| C11, C12   | JNK pan              | –                            | T183/Y185, T221/Y223          |
| C13, C14   | MKK3                 | MEK3, MAP2K3                 | S218/T222                     |
| C15, C16   | MKK6                 | MEK6, MAP2K6                 | S207/T211                     |
| C17, C18   | MSK2                 | RSK $\beta$ , RPS6KA4        | S360                          |
| D3, D4     | p38 $\alpha$         | MAPK14, SAPK2A, CSBP1        | T180/Y182                     |
| D5, D6     | p38 $\beta$          | MAPK11, SAPK2B, p38-2        | T180/Y182                     |
| D7, D8     | p38 $\delta$         | MAPK13, SAPK4                | T180/Y182                     |
| D9, D10    | p38 $\gamma$         | MAPK12, SAPK3, ERK6          | T183/Y185                     |
| D11, D12   | p53                  | –                            | S46                           |
| D13, D14   | p70 S6 Kinase        | S6K1, p70 $\alpha$ , RPS6KB1 | T421/S424                     |
| D15, D16   | RSK1                 | MAPKAPK1 $\alpha$ , RPS6KA1  | S380                          |
| D17, D18   | RSK2                 | ISPK-1, RPS6KA3              | S386                          |
| D19, D20   | TOR                  | –                            | S2448                         |
| E19, E20   | PBS                  | Control (–)                  | –                             |
| F1, F2     | Reference Spots      | –                            | –                             |

### Human Phospho-MAPK Array Coordinates

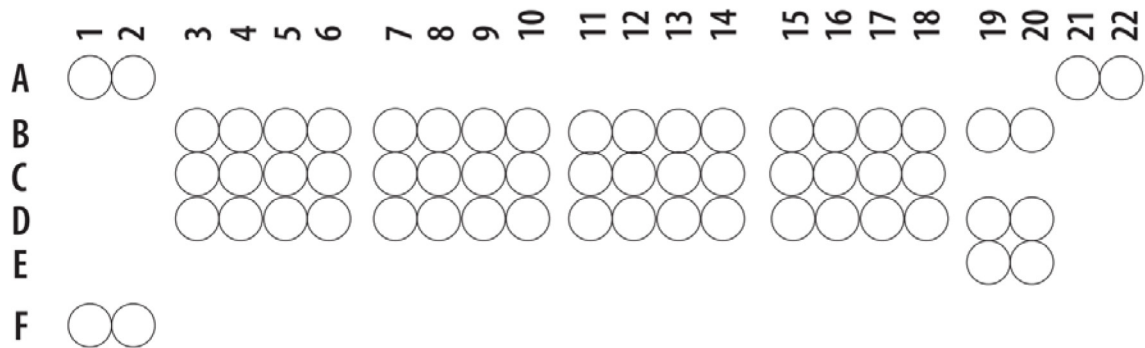

**Supplementary Table S2: Human phospho-kinase array coordinates**

| Coordinate | Target/Control       | Phosphorylation Site |
|------------|----------------------|----------------------|
| A1, A2     | Reference Spot       | -                    |
| A3, A4     | p38 $\alpha$         | T180/Y182            |
| A5, A6     | ERK1/2               | T202/Y204, T185/Y187 |
| A7, A8     | JNK pan              | T183/Y185, T221/Y223 |
| A9, A10    | GSK-3 $\alpha/\beta$ | S21/S9               |
| A13, A14   | p53                  | S392                 |
| A17, A18   | Reference Spot       | -                    |
| B3, B4     | EGF R                | Y1086                |
| B5, B6     | MSK1/2               | S376/S360            |
| B7, B8     | AMPK $\alpha$ 1      | T174                 |
| B9, B10    | Akt                  | S473                 |
| B11, B12   | Akt                  | T308                 |
| B13, B14   | p53                  | S46                  |
| C1, C2     | TOR                  | S2448                |
| C3, C4     | CREB                 | S133                 |
| C5, C6     | HSP27                | S78/S82              |
| C7, C8     | AMPK $\alpha$ 2      | T172                 |
| C9, C10    | $\beta$ -Catenin     | -                    |
| C11, C12   | p70 S6 Kinase        | T389                 |
| C13, C14   | p53                  | S15                  |
| C15, C16   | c-Jun                | S63                  |
| D1, D2     | Src                  | Y419                 |
| D3, D4     | Lyn                  | Y397                 |
| D5, D6     | Lck                  | Y394                 |
| D7, D8     | STAT2                | Y689                 |
| D9, D10    | STAT5a               | Y694                 |

|          |                        |                |
|----------|------------------------|----------------|
| D11, D12 | p70 S6 Kinase          | T421/S424      |
| D13, D14 | RSK1/2/3               | S380/S386/S377 |
| D15, D16 | eNOS                   | S1177          |
| E1, E2   | Fyn                    | Y420           |
| E3, E4   | Yes                    | Y426           |
| E5, E6   | Fgr                    | Y412           |
| E7, E8   | STAT6                  | Y641           |
| E9, E10  | STAT5b                 | Y699           |
| E11, E12 | STAT3                  | Y705           |
| E13, E14 | p27                    | T198           |
| E15, E16 | PLC- $\gamma$ 1        | Y783           |
| F1, F2   | Hck                    | Y411           |
| F3, F4   | Chk-2                  | T68            |
| F5, F6   | FAK                    | Y397           |
| F7, F8   | PDGF R $\beta$         | Y751           |
| F9, F10  | STAT5a/b               | Y694/Y699      |
| F11, F12 | STAT3                  | S727           |
| F13, F14 | WNK1                   | T60            |
| F15, F16 | PYK2                   | Y402           |
| G1, G2   | Reference Spot         | -              |
| G3, G4   | PRAS40                 | T246           |
| G9, G10  | PBS (Negative Control) | -              |
| G11, G12 | HSP60                  | -              |
| G17, G18 | PBS (Negative Control) | -              |

### Human Phospho-Kinase Array Coordinates

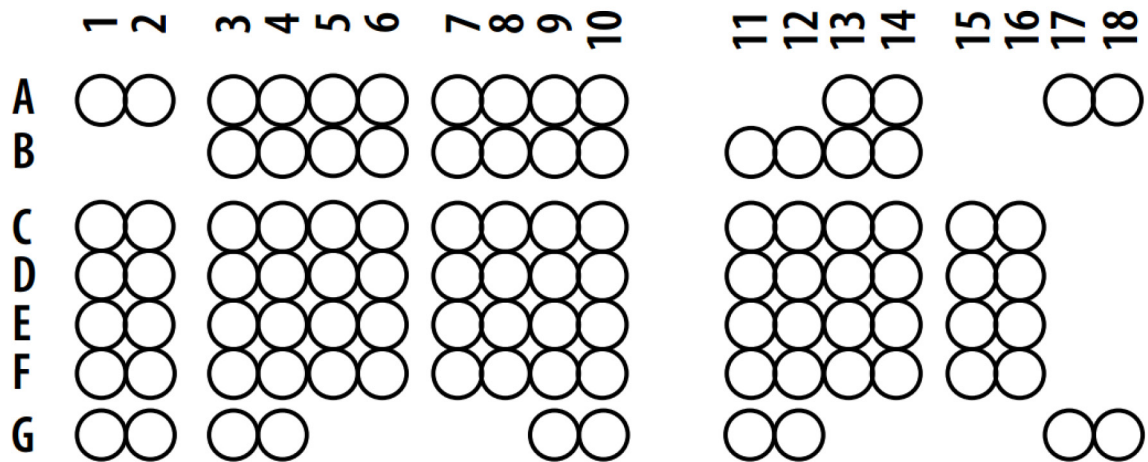

**Supplementary Table S3: Human apoptosis array coordinates**

| Coordinate | Target/Control    | Coordinate | Target/Control         |
|------------|-------------------|------------|------------------------|
| A1, A2     | Reference Spots   | C13, C14   | HO-2/HMOX2             |
| A23, A24   | Reference Spots   | C15, C16   | HSP27                  |
| B1, B2     | Bad               | C17, C18   | HSP60                  |
| B3, B4     | Bax               | C19, C20   | HSP70                  |
| B5, B6     | Bcl-2             | C21, C22   | HTRA2/Omi              |
| B7, B8     | Bcl-x             | C23, C24   | Livin                  |
| B9, B10    | Pro-caspase-3     | D1, D2     | PON2                   |
| B11, B12   | Cleaved caspase-3 | D3, D4     | p21/CIP1/CDKN1A        |
| B13, B14   | Catalase          | D5, D6     | p27/Kip1               |
| B15, B16   | cIAP-1            | D7, D8     | Phospho-p53 (S15)      |
| B17, B18   | cIAP-2            | D9, D10    | Phospho-p53 (S46)      |
| B19, B20   | Claspin           | D11, D12   | Phospho-p53 (S392)     |
| B21, B22   | Clusterin         | D13, D14   | Phospho-Rad17 (S635)   |
| B23, B24   | Cytochrome c      | D15, D16   | SMAC/Diablo            |
| C1, C2     | TRAIL R1/DR4      | D17, D18   | Survivin               |
| C3, C4     | TRAIL R2/DR5      | D19, D20   | TNF-RI/TNFRSF1A        |
| C5, C6     | FADD              | D21, D22   | XIAP                   |
| C7, C8     | Fas/TNFRSF6/CD95  | D23, D24   | PBS (Negative Control) |
| C9, C10    | HIF-1 $\alpha$    | E1, E2     | Reference Spots        |
| C11, C12   | HO-1/HMOX1/HSP32  |            |                        |

**Human Apoptosis Array Coordinates**

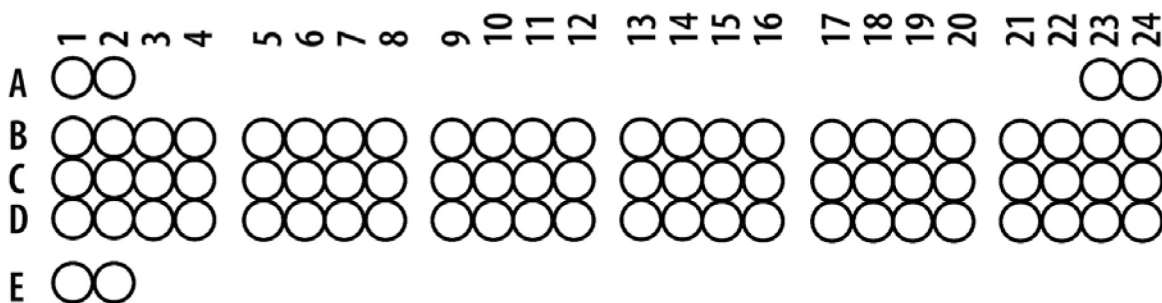

**Supplementary Table S4: Human phospho-MAPK array experimental data of BEAS-2B cells treated with 100  $\mu$ M CdCl<sub>2</sub> for 3 h**

| Target                                |         | Mean of spot<br>duplicates<br>(Set 1) | Fold   | Mean of spot<br>duplicates<br>(Set 2) | Fold   | Mean fold of set<br>1 & 2 |
|---------------------------------------|---------|---------------------------------------|--------|---------------------------------------|--------|---------------------------|
| Akt1<br>(S473)                        | Control | 501.124                               | 1.000  | 499.093                               | 1.000  | 1.000                     |
|                                       | Cd      | 79.133                                | 0.158  | 93.014                                | 0.186  | 0.172                     |
| Akt2<br>(S474)                        | Control | 383.534                               | 1.000  | 375.202                               | 1.000  | 1.000                     |
|                                       | Cd      | 383.063                               | 0.999  | 369.926                               | 0.986  | 0.992                     |
| Akt3<br>(S472)                        | Control | 21.935                                | 1.000  | 18.663                                | 1.000  | 1.000                     |
|                                       | Cd      | 21.993                                | 1.003  | 23.304                                | 1.249  | 1.116                     |
| Akt pan<br>(S473, S474, S472)         | Control | 150.510                               | 1.000  | 158.546                               | 1.000  | 1.000                     |
|                                       | Cd      | 55.190                                | 0.367  | 51.611                                | 0.326  | 0.346                     |
| CREB<br>(S133)                        | Control | 50.037                                | 1.000  | 48.013                                | 1.000  | 1.000                     |
|                                       | Cd      | 126.980                               | 2.538  | 122.363                               | 2.549  | 2.543                     |
| ERK1<br>(T202/Y204)                   | Control | 524.116                               | 1.000  | 509.179                               | 1.000  | 1.000                     |
|                                       | Cd      | 20.183                                | 0.039  | 24.246                                | 0.048  | 0.043                     |
| ERK2<br>(T185/Y187)                   | Control | 1081.539                              | 1.000  | 1087.712                              | 1.000  | 1.000                     |
|                                       | Cd      | 252.719                               | 0.234  | 252.069                               | 0.232  | 0.233                     |
| GSK-3 $\alpha$ / $\beta$<br>(S21/S9)  | Control | 490.262                               | 1.000  | 473.967                               | 1.000  | 1.000                     |
|                                       | Cd      | 437.765                               | 0.893  | 419.268                               | 0.885  | 0.889                     |
| GSK-3 $\beta$<br>(S9)                 | Control | 874.017                               | 1.000  | 899.010                               | 1.000  | 1.000                     |
|                                       | Cd      | 631.969                               | 0.723  | 640.381                               | 0.712  | 0.718                     |
| HSP27<br>(S78/S82)                    | Control | 399.391                               | 1.000  | 404.736                               | 1.000  | 1.000                     |
|                                       | Cd      | 784.707                               | 1.965  | 806.331                               | 1.992  | 1.979                     |
| JNK1<br>(T183/Y185)                   | Control | 9.761                                 | 1.000  | 8.623                                 | 1.000  | 1.000                     |
|                                       | Cd      | 102.653                               | 10.517 | 98.284                                | 11.398 | 10.930                    |
| JNK2<br>(T183/Y185)                   | Control | 58.894                                | 1.000  | 62.110                                | 1.000  | 1.000                     |
|                                       | Cd      | 498.779                               | 8.469  | 506.917                               | 8.162  | 8.311                     |
| JNK3<br>(T221/Y223)                   | Control | 21.909                                | 1.000  | 19.732                                | 1.000  | 1.000                     |
|                                       | Cd      | 16.259                                | 0.742  | 17.443                                | 0.884  | 0.809                     |
| JNK pan<br>(T183/Y185, T221/<br>Y223) | Control | 142.913                               | 1.000  | 165.899                               | 1.000  | 1.000                     |
|                                       | Cd      | 781.023                               | 5.465  | 759.829                               | 4.580  | 4.990                     |
| MKK3<br>(S218/T222)                   | Control | 75.770                                | 1.000  | 70.428                                | 1.000  | 1.000                     |
|                                       | Cd      | 62.113                                | 0.820  | 64.941                                | 0.922  | 0.869                     |
| MKK6<br>(S207/T211)                   | Control | 56.308                                | 1.000  | 57.566                                | 1.000  | 1.000                     |
|                                       | Cd      | 43.267                                | 0.768  | 47.353                                | 0.823  | 0.796                     |
| MSK2<br>(S360)                        | Control | 119.978                               | 1.000  | 133.442                               | 1.000  | 1.000                     |
|                                       | Cd      | 189.105                               | 1.576  | 173.588                               | 1.301  | 1.431                     |
| p38 $\alpha$<br>(T180/Y182)           | Control | 11.476                                | 1.000  | 11.631                                | 1.000  | 1.000                     |
|                                       | Cd      | 287.529                               | 25.055 | 297.985                               | 25.620 | 25.339                    |
| p38 $\beta$<br>(T180/Y182)            | Control | 57.859                                | 1.000  | 64.342                                | 1.000  | 1.000                     |
|                                       | Cd      | 55.609                                | 0.961  | 50.524                                | 0.785  | 0.869                     |

|                              |         |          |       |          |       |       |
|------------------------------|---------|----------|-------|----------|-------|-------|
| p38 $\delta$<br>(T180/Y182)  | Control | 367.063  | 1.000 | 384.638  | 1.000 | 1.000 |
|                              | Cd      | 1137.590 | 3.099 | 1136.525 | 2.955 | 3.025 |
| p38 $\gamma$<br>(T183/Y185)  | Control | 96.256   | 1.000 | 105.057  | 1.000 | 1.000 |
|                              | Cd      | 235.825  | 2.450 | 232.855  | 2.216 | 2.328 |
| p53<br>(S46)                 | Control | 2198.592 | 1.000 | 2253.575 | 1.000 | 1.000 |
|                              | Cd      | 1878.436 | 0.854 | 1891.655 | 0.839 | 0.847 |
| p70 S6 Kinase<br>(T421/S424) | Control | 5.747    | 1.000 | 5.100    | 1.000 | 1.000 |
|                              | Cd      | 6.949    | 1.209 | 7.991    | 1.567 | 1.377 |
| RSK1<br>(S380)               | Control | 121.066  | 1.000 | 125.575  | 1.000 | 1.000 |
|                              | Cd      | 113.978  | 0.941 | 105.432  | 0.840 | 0.890 |
| RSK2<br>(S386)               | Control | 50.274   | 1.000 | 52.433   | 1.000 | 1.000 |
|                              | Cd      | 30.280   | 0.602 | 32.262   | 0.615 | 0.609 |
| TOR<br>(S2448)               | Control | 207.262  | 1.000 | 191.382  | 1.000 | 1.000 |
|                              | Cd      | 51.191   | 0.247 | 40.861   | 0.214 | 0.231 |

Data are detailed spot densities and expressed as mean values from 2 independent experiments. The fold change was obtained by comparing Cd-treated samples with the untreated control (indicated as a value of 1).

**Supplementary Table S5: Human phospho-kinase array experimental data of BEAS-2B cells treated with 30  $\mu$ M CdCl<sub>2</sub> for 6, 12, and 24 h**

| Target                                |      | Mean of spot<br>duplicates<br>(Set 1) | Fold  | Mean of spot<br>duplicates<br>(Set 2) | Fold  | Mean fold of set<br>1 & 2 |
|---------------------------------------|------|---------------------------------------|-------|---------------------------------------|-------|---------------------------|
| p38 $\alpha$<br>(T180/Y182)           | 0 h  | 245.640                               | 1.000 | 222.589                               | 1.000 | 1.000                     |
|                                       | 6 h  | 665.736                               | 2.710 | 660.082                               | 2.965 | 2.832                     |
|                                       | 12 h | 819.190                               | 3.335 | 795.967                               | 3.576 | 3.450                     |
|                                       | 24 h | 723.360                               | 2.945 | 712.392                               | 3.200 | 3.066                     |
| ERK1/2<br>(T202/Y204, T185/<br>Y187)  | 0 h  | 679.698                               | 1.000 | 671.773                               | 1.000 | 1.000                     |
|                                       | 6 h  | 787.432                               | 1.159 | 760.818                               | 1.133 | 1.146                     |
|                                       | 12 h | 752.127                               | 1.107 | 767.412                               | 1.142 | 1.124                     |
|                                       | 24 h | 528.571                               | 0.778 | 504.920                               | 0.752 | 0.765                     |
| JNK pan<br>(T183/Y185, T221/<br>Y223) | 0 h  | 155.654                               | 1.000 | 154.040                               | 1.000 | 1.000                     |
|                                       | 6 h  | 324.939                               | 2.088 | 333.297                               | 2.164 | 2.125                     |
|                                       | 12 h | 413.904                               | 2.659 | 425.562                               | 2.763 | 2.711                     |
|                                       | 24 h | 437.266                               | 2.809 | 444.502                               | 2.886 | 2.847                     |
| GSK-3 $\alpha/\beta$<br>(S21/S9)      | 0 h  | 492.388                               | 1.000 | 488.206                               | 1.000 | 1.000                     |
|                                       | 6 h  | 565.730                               | 1.149 | 514.543                               | 1.054 | 1.102                     |
|                                       | 12 h | 411.758                               | 0.836 | 421.914                               | 0.864 | 0.850                     |
|                                       | 24 h | 402.134                               | 0.817 | 400.031                               | 0.819 | 0.818                     |
| p53<br>(S392)                         | 0 h  | 1696.102                              | 1.000 | 1745.138                              | 1.000 | 1.000                     |
|                                       | 6 h  | 1622.268                              | 0.956 | 1634.306                              | 0.936 | 0.946                     |
|                                       | 12 h | 1623.780                              | 0.957 | 1612.291                              | 0.924 | 0.940                     |
|                                       | 24 h | 1346.684                              | 0.794 | 1345.498                              | 0.771 | 0.782                     |

|                           |      |          |       |          |       |       |
|---------------------------|------|----------|-------|----------|-------|-------|
| EGF R<br>(Y1086)          | 0 h  | 390.279  | 1.000 | 385.811  | 1.000 | 1.000 |
|                           | 6 h  | 559.480  | 1.434 | 533.493  | 1.383 | 1.408 |
|                           | 12 h | 306.156  | 0.784 | 295.567  | 0.766 | 0.775 |
|                           | 24 h | 118.116  | 0.303 | 114.662  | 0.297 | 0.300 |
| MSK1/2<br>(S376/S360)     | 0 h  | 199.645  | 1.000 | 182.792  | 1.000 | 1.000 |
|                           | 6 h  | 265.963  | 1.332 | 281.624  | 1.541 | 1.432 |
|                           | 12 h | 254.782  | 1.276 | 258.625  | 1.415 | 1.342 |
|                           | 24 h | 212.264  | 1.063 | 208.816  | 1.142 | 1.101 |
| AMPK $\alpha$ 1<br>(T174) | 0 h  | 200.496  | 1.000 | 191.665  | 1.000 | 1.000 |
|                           | 6 h  | 259.502  | 1.294 | 269.992  | 1.409 | 1.350 |
|                           | 12 h | 123.259  | 0.615 | 131.958  | 0.688 | 0.651 |
|                           | 24 h | 193.514  | 0.965 | 196.127  | 1.023 | 0.994 |
| Akt<br>(S473)             | 0 h  | 960.303  | 1.000 | 855.307  | 1.000 | 1.000 |
|                           | 6 h  | 1024.307 | 1.067 | 1020.366 | 1.193 | 1.126 |
|                           | 12 h | 1087.490 | 1.132 | 1085.240 | 1.269 | 1.197 |
|                           | 24 h | 572.120  | 0.596 | 576.221  | 0.674 | 0.632 |
| Akt<br>(T308)             | 0 h  | 221.483  | 1.000 | 240.710  | 1.000 | 1.000 |
|                           | 6 h  | 304.780  | 1.376 | 317.266  | 1.318 | 1.346 |
|                           | 12 h | 268.201  | 1.211 | 292.382  | 1.215 | 1.213 |
|                           | 24 h | 202.085  | 0.912 | 192.349  | 0.799 | 0.853 |
| p53<br>(S46)              | 0 h  | 1268.249 | 1.000 | 1322.966 | 1.000 | 1.000 |
|                           | 6 h  | 1236.464 | 0.975 | 1249.800 | 0.945 | 0.959 |
|                           | 12 h | 1198.607 | 0.945 | 1198.614 | 0.906 | 0.925 |
|                           | 24 h | 969.898  | 0.765 | 969.257  | 0.733 | 0.748 |
| TOR<br>(S2448)            | 0 h  | 170.604  | 1.000 | 161.173  | 1.000 | 1.000 |
|                           | 6 h  | 181.003  | 1.061 | 176.036  | 1.092 | 1.076 |
|                           | 12 h | 168.813  | 0.990 | 167.736  | 1.041 | 1.014 |
|                           | 24 h | 120.110  | 0.704 | 120.197  | 0.746 | 0.724 |
| CREB<br>(S133)            | 0 h  | 382.525  | 1.000 | 369.023  | 1.000 | 1.000 |
|                           | 6 h  | 503.405  | 1.316 | 481.816  | 1.306 | 1.311 |
|                           | 12 h | 660.428  | 1.726 | 627.114  | 1.699 | 1.713 |
|                           | 24 h | 671.161  | 1.755 | 653.974  | 1.772 | 1.763 |
| HSP27<br>(S78/S82)        | 0 h  | 114.408  | 1.000 | 97.573   | 1.000 | 1.000 |
|                           | 6 h  | 168.670  | 1.474 | 155.297  | 1.592 | 1.528 |
|                           | 12 h | 183.491  | 1.604 | 184.920  | 1.895 | 1.738 |
|                           | 24 h | 439.308  | 3.840 | 437.313  | 4.482 | 4.135 |
| AMPK $\alpha$ 2<br>(T172) | 0 h  | 227.157  | 1.000 | 219.384  | 1.000 | 1.000 |
|                           | 6 h  | 388.362  | 1.710 | 403.542  | 1.839 | 1.773 |
|                           | 12 h | 351.119  | 1.546 | 340.856  | 1.554 | 1.550 |
|                           | 24 h | 352.636  | 1.552 | 362.435  | 1.652 | 1.601 |

|                             |      |          |       |          |       |       |
|-----------------------------|------|----------|-------|----------|-------|-------|
| β-Catenin                   | 0 h  | 363.008  | 1.000 | 422.602  | 1.000 | 1.000 |
|                             | 6 h  | 722.489  | 1.990 | 714.854  | 1.692 | 1.830 |
|                             | 12 h | 621.775  | 1.713 | 642.054  | 1.519 | 1.609 |
|                             | 24 h | 441.531  | 1.216 | 416.846  | 0.986 | 1.093 |
| p70S6 Kinase<br>(T389)      | 0 h  | 59.255   | 1.000 | 65.744   | 1.000 | 1.000 |
|                             | 6 h  | 85.936   | 1.450 | 83.043   | 1.263 | 1.352 |
|                             | 12 h | 43.499   | 0.734 | 42.397   | 0.645 | 0.687 |
|                             | 24 h | 49.514   | 0.836 | 48.399   | 0.736 | 0.783 |
| p53<br>(S15)                | 0 h  | 1128.811 | 1.000 | 1170.816 | 1.000 | 1.000 |
|                             | 6 h  | 1147.771 | 1.017 | 1128.620 | 0.964 | 0.990 |
|                             | 12 h | 802.030  | 0.711 | 841.798  | 0.719 | 0.715 |
|                             | 24 h | 737.689  | 0.654 | 693.264  | 0.592 | 0.622 |
| c-Jun<br>(S63)              | 0 h  | 214.982  | 1.000 | 228.699  | 1.000 | 1.000 |
|                             | 6 h  | 1027.241 | 4.778 | 1013.019 | 4.429 | 4.598 |
|                             | 12 h | 1299.765 | 6.046 | 1362.902 | 5.959 | 6.001 |
|                             | 24 h | 1197.815 | 5.572 | 1228.344 | 5.371 | 5.468 |
| Src<br>(Y419)               | 0 h  | 162.438  | 1.000 | 150.212  | 1.000 | 1.000 |
|                             | 6 h  | 162.105  | 0.998 | 163.538  | 1.089 | 1.042 |
|                             | 12 h | 145.053  | 0.893 | 144.853  | 0.964 | 0.927 |
|                             | 24 h | 114.595  | 0.705 | 114.609  | 0.763 | 0.733 |
| Lyn<br>(Y397)               | 0 h  | 103.952  | 1.000 | 97.899   | 1.000 | 1.000 |
|                             | 6 h  | 92.979   | 0.894 | 87.952   | 0.898 | 0.896 |
|                             | 12 h | 106.810  | 1.027 | 101.346  | 1.035 | 1.031 |
|                             | 24 h | 129.178  | 1.243 | 125.329  | 1.280 | 1.261 |
| Lck<br>(Y394)               | 0 h  | 56.689   | 1.000 | 52.599   | 1.000 | 1.000 |
|                             | 6 h  | 41.031   | 0.724 | 42.142   | 0.801 | 0.761 |
|                             | 12 h | 46.122   | 0.814 | 48.212   | 0.917 | 0.863 |
|                             | 24 h | 71.773   | 1.266 | 66.183   | 1.258 | 1.262 |
| STAT2<br>(Y689)             | 0 h  | 373.822  | 1.000 | 386.126  | 1.000 | 1.000 |
|                             | 6 h  | 504.010  | 1.348 | 513.155  | 1.329 | 1.338 |
|                             | 12 h | 466.010  | 1.247 | 471.160  | 1.220 | 1.233 |
|                             | 24 h | 466.010  | 1.247 | 467.439  | 1.211 | 1.228 |
| STAT5a<br>(Y694)            | 0 h  | 228.171  | 1.000 | 218.578  | 1.000 | 1.000 |
|                             | 6 h  | 295.025  | 1.293 | 283.295  | 1.296 | 1.293 |
|                             | 12 h | 288.180  | 1.263 | 276.594  | 1.265 | 1.263 |
|                             | 24 h | 301.408  | 1.321 | 327.535  | 1.498 | 1.406 |
| p70S6 Kinase<br>(T421/S424) | 0 h  | 189.728  | 1.000 | 190.402  | 1.000 | 1.000 |
|                             | 6 h  | 259.689  | 1.369 | 264.577  | 1.390 | 1.379 |
|                             | 12 h | 180.106  | 0.949 | 182.451  | 0.958 | 0.954 |
|                             | 24 h | 167.857  | 0.885 | 167.092  | 0.878 | 0.881 |



|                              |      |         |       |         |       |       |
|------------------------------|------|---------|-------|---------|-------|-------|
| RSK1/2/3<br>(S380/S386/S377) | 0 h  | 293.290 | 1.000 | 298.408 | 1.000 | 1.000 |
|                              | 6 h  | 282.084 | 0.962 | 281.766 | 0.944 | 0.953 |
|                              | 12 h | 242.567 | 0.827 | 239.093 | 0.801 | 0.814 |
|                              | 24 h | 397.759 | 1.356 | 393.939 | 1.320 | 1.338 |
| eNOS<br>(S1177)              | 0 h  | 109.954 | 1.000 | 113.510 | 1.000 | 1.000 |
|                              | 6 h  | 139.574 | 1.269 | 152.817 | 1.346 | 1.308 |
|                              | 12 h | 130.646 | 1.188 | 141.155 | 1.244 | 1.216 |
|                              | 24 h | 125.083 | 1.138 | 124.679 | 1.098 | 1.118 |
| Fyn<br>(Y420)                | 0 h  | 141.792 | 1.000 | 141.800 | 1.000 | 1.000 |
|                              | 6 h  | 123.703 | 0.872 | 128.138 | 0.904 | 0.888 |
|                              | 12 h | 128.367 | 0.905 | 130.797 | 0.922 | 0.914 |
|                              | 24 h | 102.064 | 0.720 | 100.214 | 0.707 | 0.713 |
| Yes<br>(Y426)                | 0 h  | 204.052 | 1.000 | 189.457 | 1.000 | 1.000 |
|                              | 6 h  | 197.299 | 0.967 | 191.132 | 1.009 | 0.987 |
|                              | 12 h | 191.728 | 0.940 | 178.310 | 0.941 | 0.940 |
|                              | 24 h | 164.533 | 0.806 | 162.604 | 0.858 | 0.831 |
| Fgr<br>(Y412)                | 0 h  | 61.842  | 1.000 | 46.736  | 1.000 | 1.000 |
|                              | 6 h  | 53.883  | 0.871 | 43.170  | 0.924 | 0.894 |
|                              | 12 h | 53.045  | 0.858 | 46.328  | 0.991 | 0.915 |
|                              | 24 h | 60.999  | 0.986 | 54.630  | 1.169 | 1.065 |
| STAT6<br>(Y641)              | 0 h  | 110.397 | 1.000 | 102.387 | 1.000 | 1.000 |
|                              | 6 h  | 193.691 | 1.754 | 246.962 | 2.412 | 2.071 |
|                              | 12 h | 233.859 | 2.118 | 249.123 | 2.433 | 2.270 |
|                              | 24 h | 213.348 | 1.933 | 215.718 | 2.107 | 2.016 |
| STAT5b<br>(Y699)             | 0 h  | 45.589  | 1.000 | 54.579  | 1.000 | 1.000 |
|                              | 6 h  | 172.256 | 3.778 | 183.196 | 3.357 | 3.549 |
|                              | 12 h | 201.899 | 4.429 | 208.690 | 3.824 | 4.099 |
|                              | 24 h | 144.802 | 3.176 | 139.900 | 2.563 | 2.842 |
| STAT3<br>(Y705)              | 0 h  | 101.393 | 1.000 | 96.248  | 1.000 | 1.000 |
|                              | 6 h  | 176.647 | 1.742 | 180.128 | 1.871 | 1.805 |
|                              | 12 h | 95.802  | 0.945 | 90.280  | 0.938 | 0.942 |
|                              | 24 h | 105.313 | 1.039 | 107.053 | 1.112 | 1.075 |
| p27<br>(T198)                | 0 h  | 28.069  | 1.000 | 30.168  | 1.000 | 1.000 |
|                              | 6 h  | 33.589  | 1.197 | 33.382  | 1.107 | 1.150 |
|                              | 12 h | 25.119  | 0.895 | 24.703  | 0.819 | 0.856 |
|                              | 24 h | 28.121  | 1.002 | 30.341  | 1.006 | 1.004 |
| PLC- $\gamma$ 1<br>(Y783)    | 0 h  | 124.755 | 1.000 | 124.418 | 1.000 | 1.000 |
|                              | 6 h  | 153.472 | 1.230 | 186.841 | 1.502 | 1.366 |
|                              | 12 h | 171.311 | 1.373 | 168.096 | 1.351 | 1.362 |
|                              | 24 h | 153.257 | 1.228 | 141.631 | 1.138 | 1.183 |

|                          |      |          |       |          |       |       |
|--------------------------|------|----------|-------|----------|-------|-------|
| Hck<br>(Y411)            | 0 h  | 144.685  | 1.000 | 153.988  | 1.000 | 1.000 |
|                          | 6 h  | 160.041  | 1.106 | 161.315  | 1.048 | 1.078 |
|                          | 12 h | 152.598  | 1.055 | 154.753  | 1.005 | 1.029 |
|                          | 24 h | 114.853  | 0.794 | 104.771  | 0.680 | 0.735 |
| Chk-2<br>(T68)           | 0 h  | 285.327  | 1.000 | 268.784  | 1.000 | 1.000 |
|                          | 6 h  | 326.346  | 1.144 | 317.631  | 1.182 | 1.162 |
|                          | 12 h | 295.611  | 1.036 | 288.143  | 1.072 | 1.053 |
|                          | 24 h | 217.787  | 0.763 | 213.066  | 0.793 | 0.778 |
| FAK<br>(Y397)            | 0 h  | 187.013  | 1.000 | 163.808  | 1.000 | 1.000 |
|                          | 6 h  | 209.884  | 1.122 | 163.444  | 0.998 | 1.064 |
|                          | 12 h | 194.958  | 1.042 | 170.366  | 1.040 | 1.041 |
|                          | 24 h | 126.833  | 0.678 | 122.853  | 0.750 | 0.712 |
| PDGF R $\beta$<br>(Y751) | 0 h  | 63.156   | 1.000 | 55.463   | 1.000 | 1.000 |
|                          | 6 h  | 78.498   | 1.243 | 77.896   | 1.404 | 1.318 |
|                          | 12 h | 72.142   | 1.142 | 77.248   | 1.393 | 1.259 |
|                          | 24 h | 69.021   | 1.093 | 66.276   | 1.195 | 1.141 |
| STAT5a/b<br>(Y694/Y699)  | 0 h  | 161.591  | 1.000 | 136.507  | 1.000 | 1.000 |
|                          | 6 h  | 223.709  | 1.384 | 241.850  | 1.772 | 1.562 |
|                          | 12 h | 274.657  | 1.700 | 303.715  | 2.225 | 1.940 |
|                          | 24 h | 270.313  | 1.673 | 246.703  | 1.807 | 1.734 |
| STAT3<br>(S727)          | 0 h  | 49.034   | 1.000 | 55.617   | 1.000 | 1.000 |
|                          | 6 h  | 124.132  | 2.532 | 173.793  | 3.125 | 2.847 |
|                          | 12 h | 63.763   | 1.300 | 65.714   | 1.182 | 1.237 |
|                          | 24 h | 63.918   | 1.304 | 76.292   | 1.372 | 1.340 |
| WNK1<br>(T60)            | 0 h  | 1045.384 | 1.000 | 1140.931 | 1.000 | 1.000 |
|                          | 6 h  | 1549.620 | 1.482 | 1514.198 | 1.327 | 1.401 |
|                          | 12 h | 1166.632 | 1.116 | 1036.972 | 0.909 | 1.008 |
|                          | 24 h | 1057.450 | 1.012 | 1041.994 | 0.913 | 0.960 |
| PYK2<br>(Y402)           | 0 h  | 87.538   | 1.000 | 85.262   | 1.000 | 1.000 |
|                          | 6 h  | 128.462  | 1.468 | 129.804  | 1.522 | 1.495 |
|                          | 12 h | 98.706   | 1.128 | 110.149  | 1.292 | 1.209 |
|                          | 24 h | 84.060   | 0.960 | 80.332   | 0.942 | 0.951 |
| PRAS40<br>(T246)         | 0 h  | 785.907  | 1.000 | 783.596  | 1.000 | 1.000 |
|                          | 6 h  | 768.492  | 0.978 | 748.362  | 0.955 | 0.966 |
|                          | 12 h | 744.068  | 0.947 | 723.522  | 0.923 | 0.935 |
|                          | 24 h | 567.480  | 0.722 | 565.132  | 0.721 | 0.722 |
| HSP60                    | 0 h  | 324.045  | 1.000 | 288.985  | 1.000 | 1.000 |
|                          | 6 h  | 605.500  | 1.869 | 606.944  | 2.100 | 1.978 |
|                          | 12 h | 484.679  | 1.496 | 487.185  | 1.686 | 1.585 |
|                          | 24 h | 410.733  | 1.268 | 406.653  | 1.407 | 1.333 |

Data are detailed spot densities and expressed as mean values from 2 independent experiments. The fold change was obtained by comparing Cd-treated samples with the untreated control (indicated as a value of 1).

**Supplementary Table S6: Human apoptosis array experimental data of BEAS-2B cells treated with 30  $\mu$ M CdCl<sub>2</sub> for 24 h**

| Target            |         | Mean of spot<br>duplicates<br>(Set 1) | Fold  | Mean of spot<br>duplicates<br>(Set 2) | Fold  | Mean fold of<br>set 1 & 2 |
|-------------------|---------|---------------------------------------|-------|---------------------------------------|-------|---------------------------|
| Bad               | Control | 339.072                               | 1.000 | 307.284                               | 1.000 | 1.000                     |
|                   | Cd      | 339.587                               | 1.002 | 313.459                               | 1.020 | 1.010                     |
| Bax               | Control | 213.560                               | 1.000 | 192.088                               | 1.000 | 1.000                     |
|                   | Cd      | 381.014                               | 1.784 | 370.298                               | 1.928 | 1.852                     |
| Bcl-2             | Control | 103.963                               | 1.000 | 117.888                               | 1.000 | 1.000                     |
|                   | Cd      | 101.536                               | 0.977 | 106.826                               | 0.906 | 0.939                     |
| Bcl-x             | Control | 41.659                                | 1.000 | 72.977                                | 1.000 | 1.000                     |
|                   | Cd      | 44.697                                | 1.073 | 73.469                                | 1.007 | 1.031                     |
| Pro-caspase-3     | Control | 1217.254                              | 1.000 | 1205.082                              | 1.000 | 1.000                     |
|                   | Cd      | 1026.746                              | 0.843 | 1011.958                              | 0.840 | 0.842                     |
| Cleaved caspase-3 | Control | 261.067                               | 1.000 | 150.148                               | 1.000 | 1.000                     |
|                   | Cd      | 518.712                               | 1.987 | 490.232                               | 3.265 | 2.454                     |
| Catalase          | Control | 122.528                               | 1.000 | 129.589                               | 1.000 | 1.000                     |
|                   | Cd      | 201.634                               | 1.646 | 205.796                               | 1.588 | 1.616                     |
| cIAP-1            | Control | 306.833                               | 1.000 | 309.813                               | 1.000 | 1.000                     |
|                   | Cd      | 36.004                                | 0.117 | 38.974                                | 0.126 | 0.122                     |
| cIAP-2            | Control | 94.807                                | 1.000 | 124.906                               | 1.000 | 1.000                     |
|                   | Cd      | 79.358                                | 0.837 | 79.900                                | 0.640 | 0.725                     |
| Claspin           | Control | 312.843                               | 1.000 | 331.120                               | 1.000 | 1.000                     |
|                   | Cd      | 173.614                               | 0.555 | 175.542                               | 0.530 | 0.542                     |
| Clusterin         | Control | 125.558                               | 1.000 | 119.500                               | 1.000 | 1.000                     |
|                   | Cd      | 259.574                               | 2.067 | 258.528                               | 2.163 | 2.114                     |
| Cytochrome c      | Control | 226.787                               | 1.000 | 205.236                               | 1.000 | 1.000                     |
|                   | Cd      | 228.640                               | 1.008 | 225.668                               | 1.100 | 1.052                     |
| TRAIL R1/DR4      | Control | 486.885                               | 1.000 | 495.589                               | 1.000 | 1.000                     |
|                   | Cd      | 501.280                               | 1.030 | 501.750                               | 1.012 | 1.021                     |
| TRAIL R2/DR5      | Control | 495.777                               | 1.000 | 486.871                               | 1.000 | 1.000                     |
|                   | Cd      | 530.460                               | 1.070 | 521.224                               | 1.071 | 1.070                     |
| FADD              | Control | 352.667                               | 1.000 | 353.443                               | 1.000 | 1.000                     |
|                   | Cd      | 371.243                               | 1.053 | 374.479                               | 1.060 | 1.056                     |
| Fas/TNFRSF6/CD95  | Control | 619.060                               | 1.000 | 606.731                               | 1.000 | 1.000                     |
|                   | Cd      | 631.248                               | 1.020 | 624.036                               | 1.029 | 1.024                     |
| HIF-1 $\alpha$    | Control | 358.130                               | 1.000 | 381.667                               | 1.000 | 1.000                     |
|                   | Cd      | 851.632                               | 2.378 | 860.036                               | 2.253 | 2.314                     |
| HO-1/HMOX1/HSP32  | Control | 310.154                               | 1.000 | 244.051                               | 1.000 | 1.000                     |
|                   | Cd      | 672.055                               | 2.167 | 646.177                               | 2.648 | 2.379                     |

|                      |         |         |       |         |       |       |
|----------------------|---------|---------|-------|---------|-------|-------|
| HO-2/HMOX2           | Control | 395.649 | 1.000 | 380.104 | 1.000 | 1.000 |
|                      | Cd      | 409.776 | 1.036 | 400.478 | 1.054 | 1.044 |
| HSP27                | Control | 436.717 | 1.000 | 432.289 | 1.000 | 1.000 |
|                      | Cd      | 924.061 | 2.116 | 922.205 | 2.133 | 2.125 |
| HSP60                | Control | 427.526 | 1.000 | 431.357 | 1.000 | 1.000 |
|                      | Cd      | 530.906 | 1.242 | 537.346 | 1.246 | 1.244 |
| HSP70                | Control | 420.807 | 1.000 | 417.311 | 1.000 | 1.000 |
|                      | Cd      | 460.525 | 1.094 | 438.273 | 1.050 | 1.072 |
| HTRA2/Omi            | Control | 326.893 | 1.000 | 335.883 | 1.000 | 1.000 |
|                      | Cd      | 221.905 | 0.679 | 231.831 | 0.690 | 0.685 |
| Livin                | Control | 33.716  | 1.000 | 28.338  | 1.000 | 1.000 |
|                      | Cd      | 32.728  | 0.971 | 31.890  | 1.125 | 1.041 |
| PON2                 | Control | 93.788  | 1.000 | 78.956  | 1.000 | 1.000 |
|                      | Cd      | 87.426  | 0.932 | 86.588  | 1.097 | 1.007 |
| p21/CIP1/CDKN1A      | Control | 136.791 | 1.000 | 167.210 | 1.000 | 1.000 |
|                      | Cd      | 65.091  | 0.476 | 75.003  | 0.449 | 0.461 |
| p27/Kip1             | Control | 95.858  | 1.000 | 131.020 | 1.000 | 1.000 |
|                      | Cd      | 61.417  | 0.641 | 79.021  | 0.603 | 0.619 |
| Phospho-p53 (S15)    | Control | 896.225 | 1.000 | 907.614 | 1.000 | 1.000 |
|                      | Cd      | 553.582 | 0.618 | 557.854 | 0.615 | 0.616 |
| Phospho-p53 (S46)    | Control | 636.940 | 1.000 | 653.143 | 1.000 | 1.000 |
|                      | Cd      | 376.267 | 0.591 | 376.767 | 0.577 | 0.584 |
| Phospho-p53 (S392)   | Control | 921.433 | 1.000 | 921.414 | 1.000 | 1.000 |
|                      | Cd      | 723.151 | 0.785 | 719.831 | 0.781 | 0.783 |
| Phospho-Rad17 (S635) | Control | 266.783 | 1.000 | 245.316 | 1.000 | 1.000 |
|                      | Cd      | 264.050 | 0.990 | 222.432 | 0.907 | 0.950 |
| SMAC/Diablo          | Control | 579.505 | 1.000 | 558.304 | 1.000 | 1.000 |
|                      | Cd      | 546.440 | 0.943 | 530.630 | 0.950 | 0.947 |
| Survivin             | Control | 289.538 | 1.000 | 283.179 | 1.000 | 1.000 |
|                      | Cd      | 148.262 | 0.512 | 143.522 | 0.507 | 0.509 |
| TNF-RI/TNFRSF1A      | Control | 27.424  | 1.000 | 30.758  | 1.000 | 1.000 |
|                      | Cd      | 11.494  | 0.419 | 16.142  | 0.525 | 0.475 |
| XIAP                 | Control | 313.113 | 1.000 | 325.148 | 1.000 | 1.000 |
|                      | Cd      | 25.244  | 0.081 | 25.306  | 0.078 | 0.079 |

Data are detailed spot densities and expressed as mean values from 2 independent experiments. The fold change was obtained by comparing Cd-treated samples with the untreated control (indicated as a value of 1).

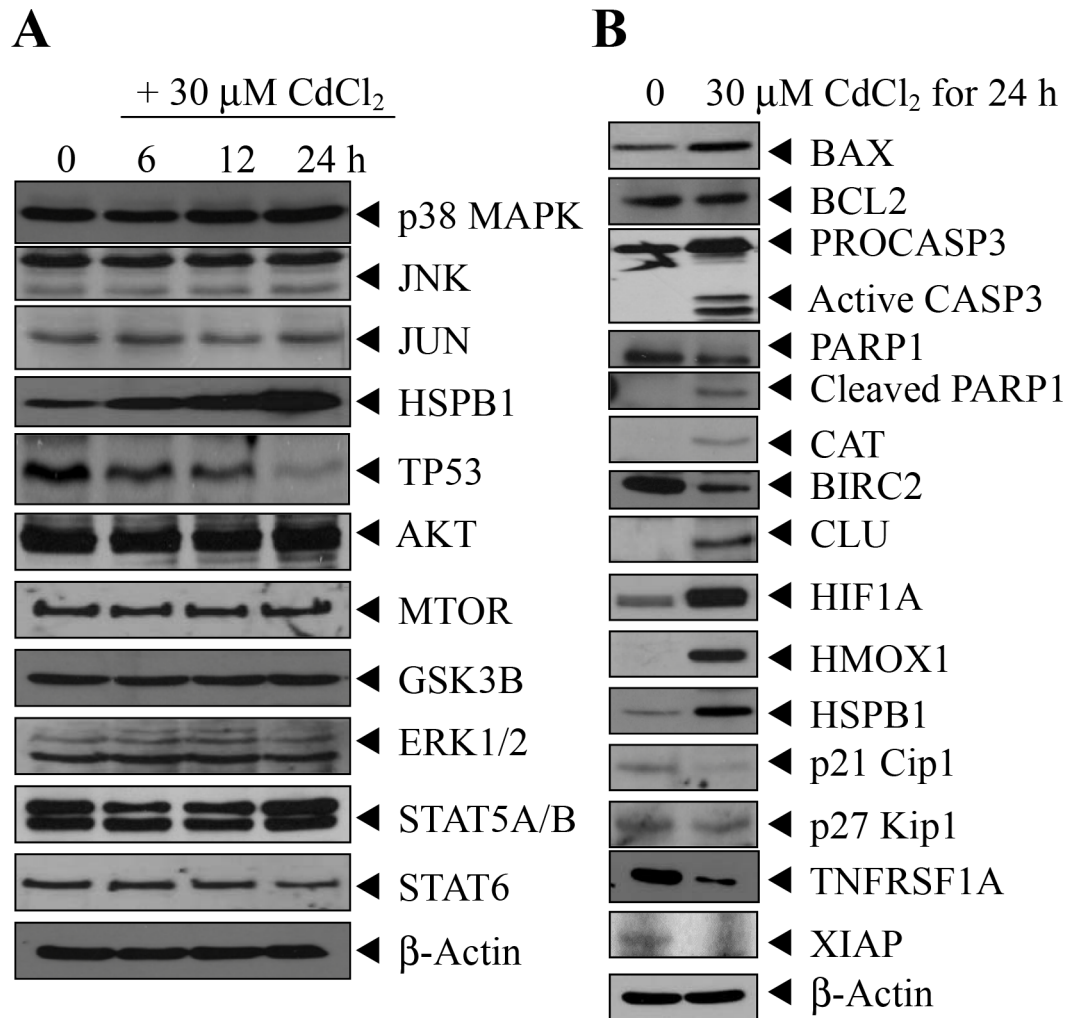

**Supplementary Figure S1: Confirmation of protein array data by western blot analyses.** BEAS-2B cells were sham-exposed or treated with (A) 30  $\mu\text{M}$  CdCl<sub>2</sub> for the indicated time or (B) 30  $\mu\text{M}$  CdCl<sub>2</sub> for 24 h; cells were lysed; and protein extracts were subjected to western blot analysis using various antibodies. The same blot was stripped and reprobbed with a monoclonal  $\beta$ -actin antibody to monitor the loading difference. Data are representative of three independent experiments.

**A**

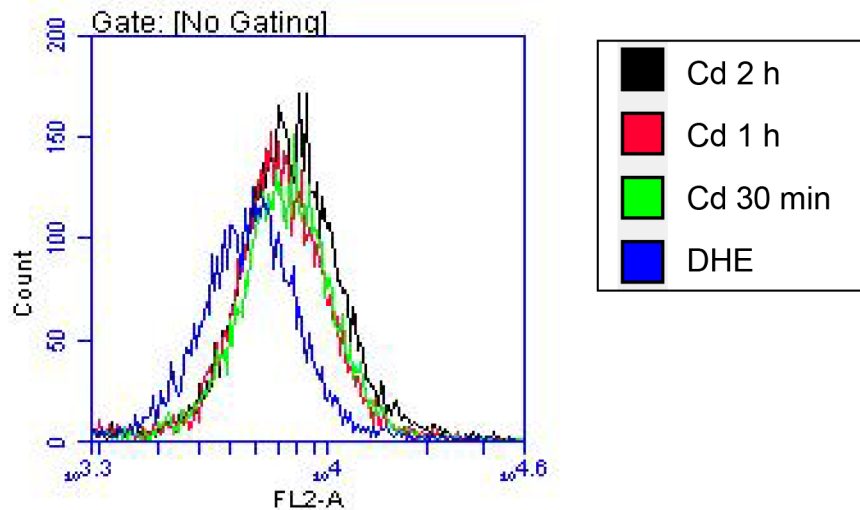

**B**

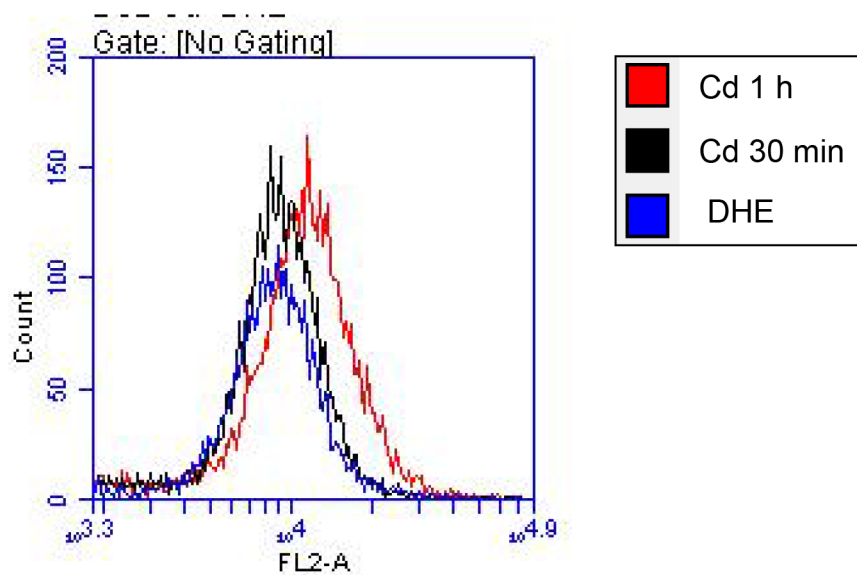

**Supplementary Figure S2: Measurement of ROS generation.** ROS level of different time points in CdCl<sub>2</sub> treated BEAS-2B cells stained with DHE. ROS level increased after treatment with (A) 100 μM or (B) 30 μM CdCl<sub>2</sub>. Data are representative of three independent experiments.
